# Supplementary material
Source: PubMed Central journal article supplement (PMC2743121)
Supplement: NIHMS140505-supplement-4.pdf [file NIHMS140505-supplement-4.pdf]

*Egr2*<sup>+/-</sup>; *Atoh1*<sup>+flox</sup>

*Egr2*; *Atoh1*<sup>CKO</sup>

*Hoxb1*; *Atoh1*<sup>CKO</sup>

Rostral

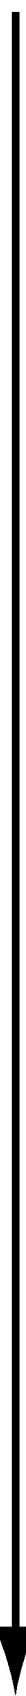

Caudal

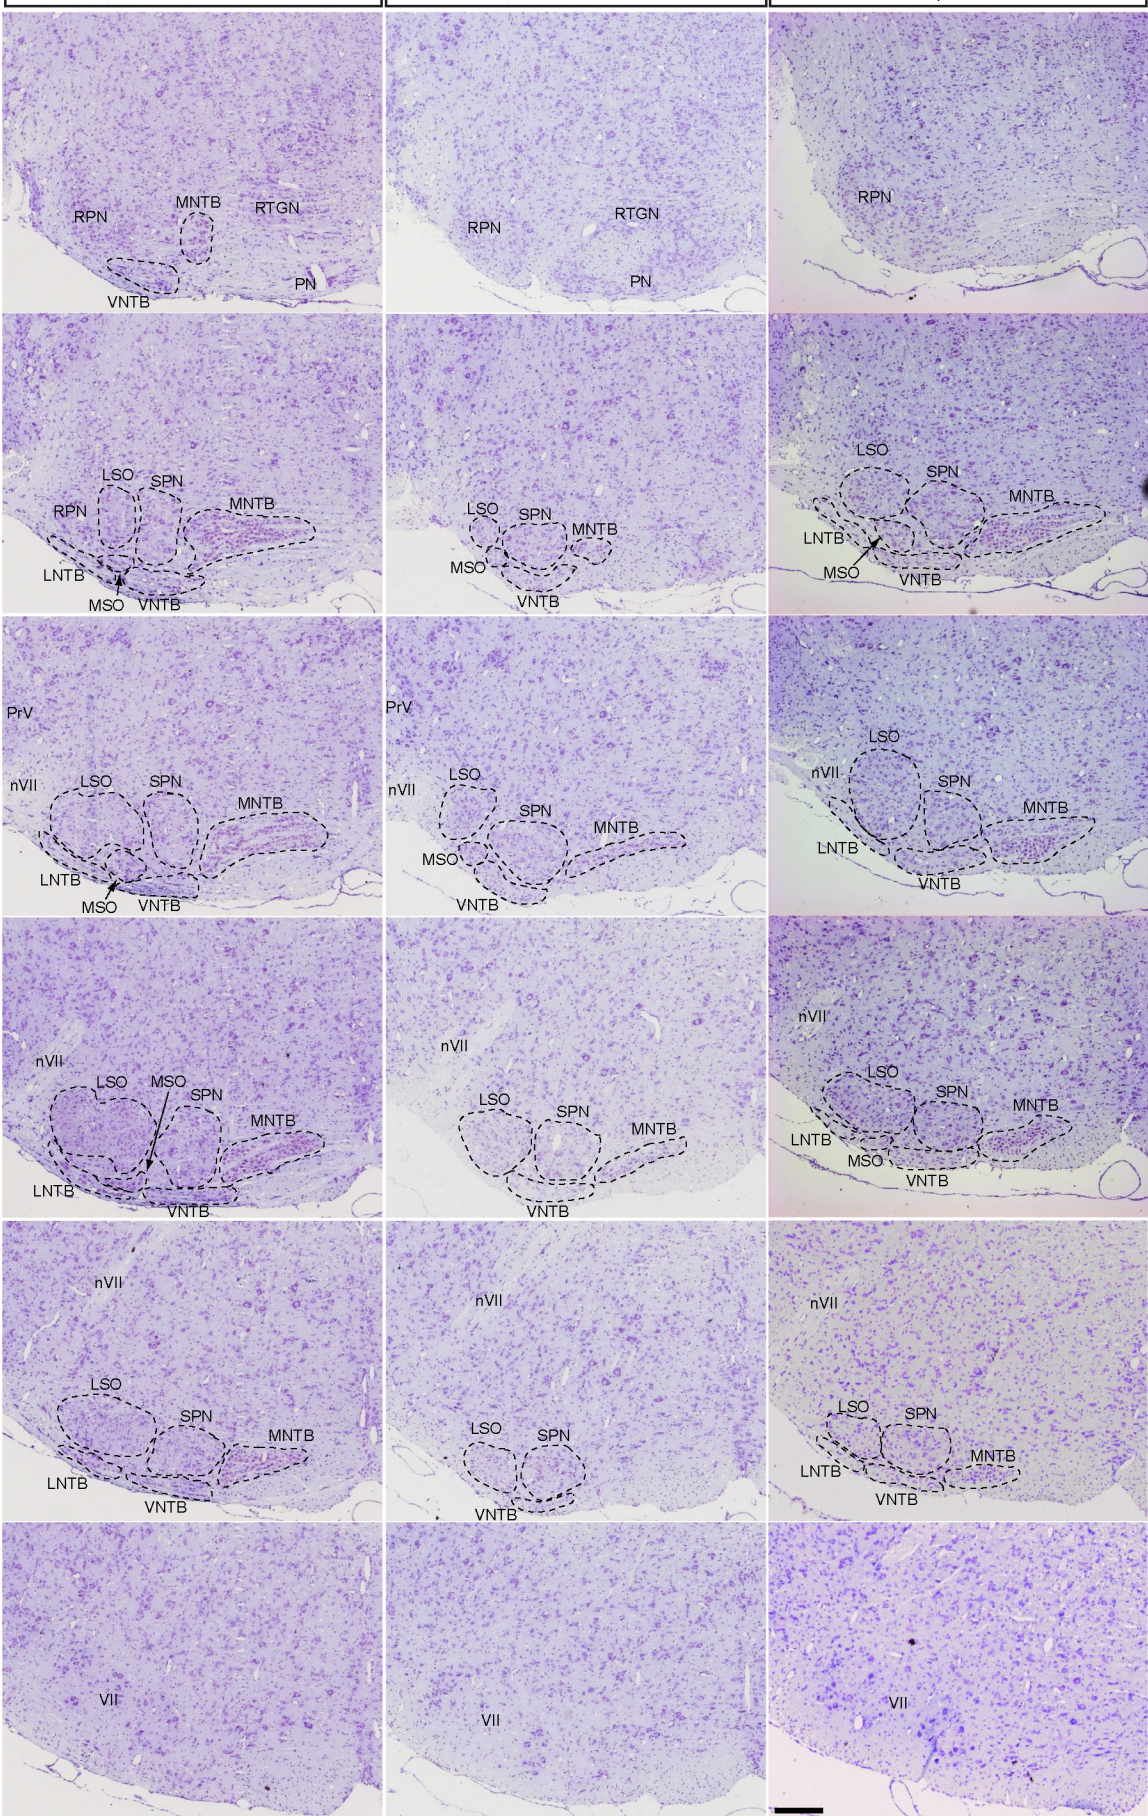

Supplemental Figure 2 - Marichich
