# Supplementary material
Source: PubMed Central journal article supplement (PMC2743121)

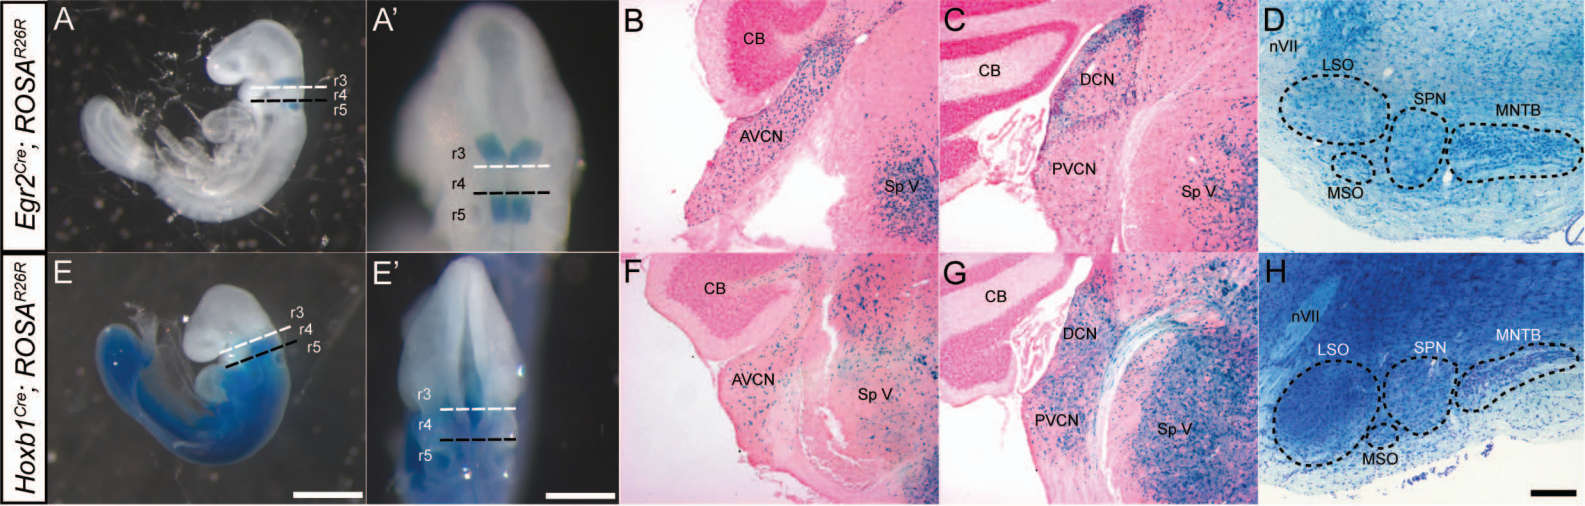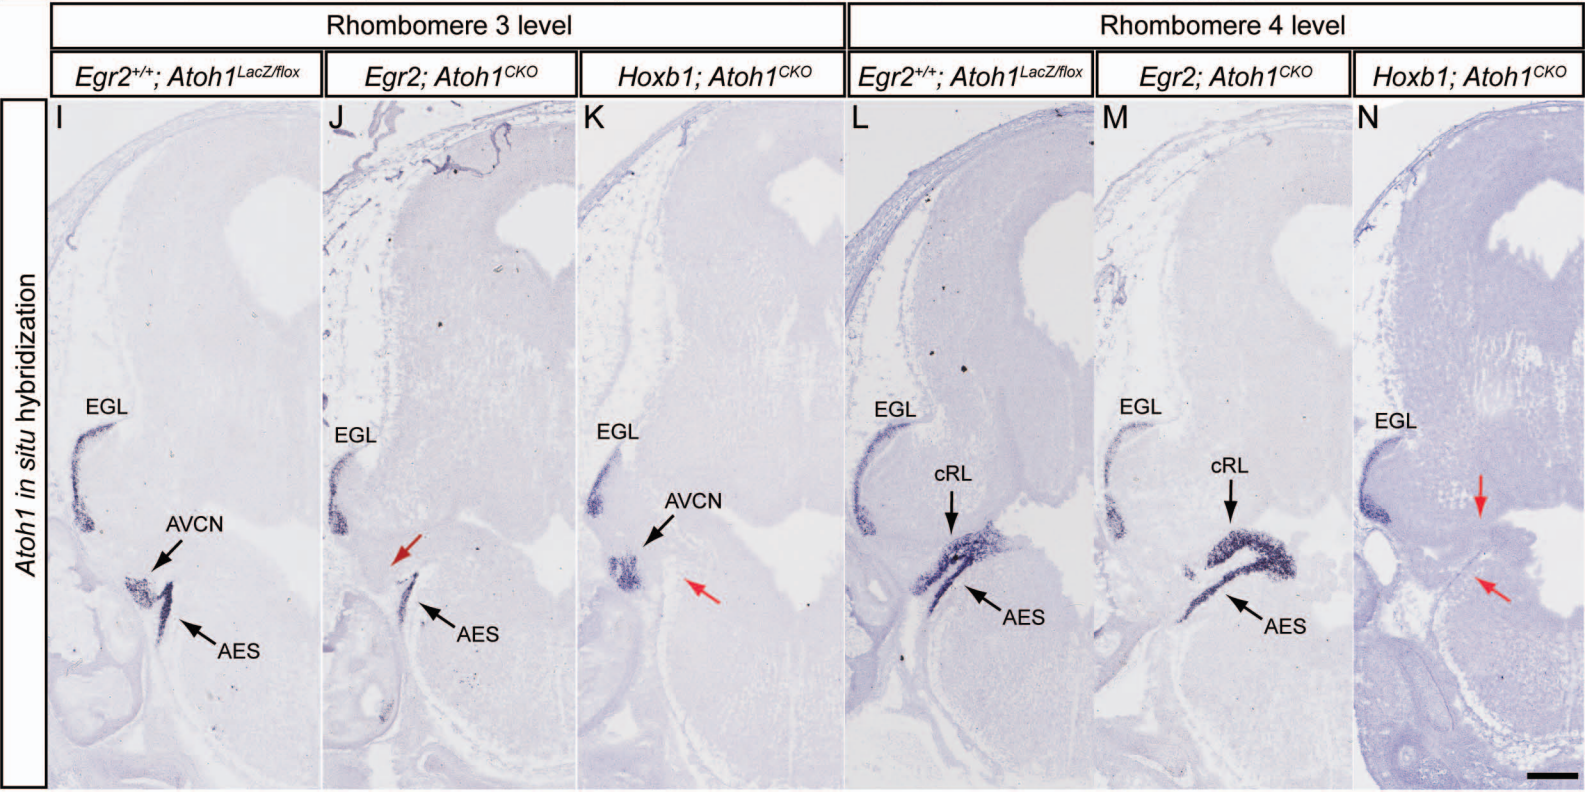

Supplement: NIHMS140505-supplement-1.pdf [file NIHMS140505-supplement-1.pdf]

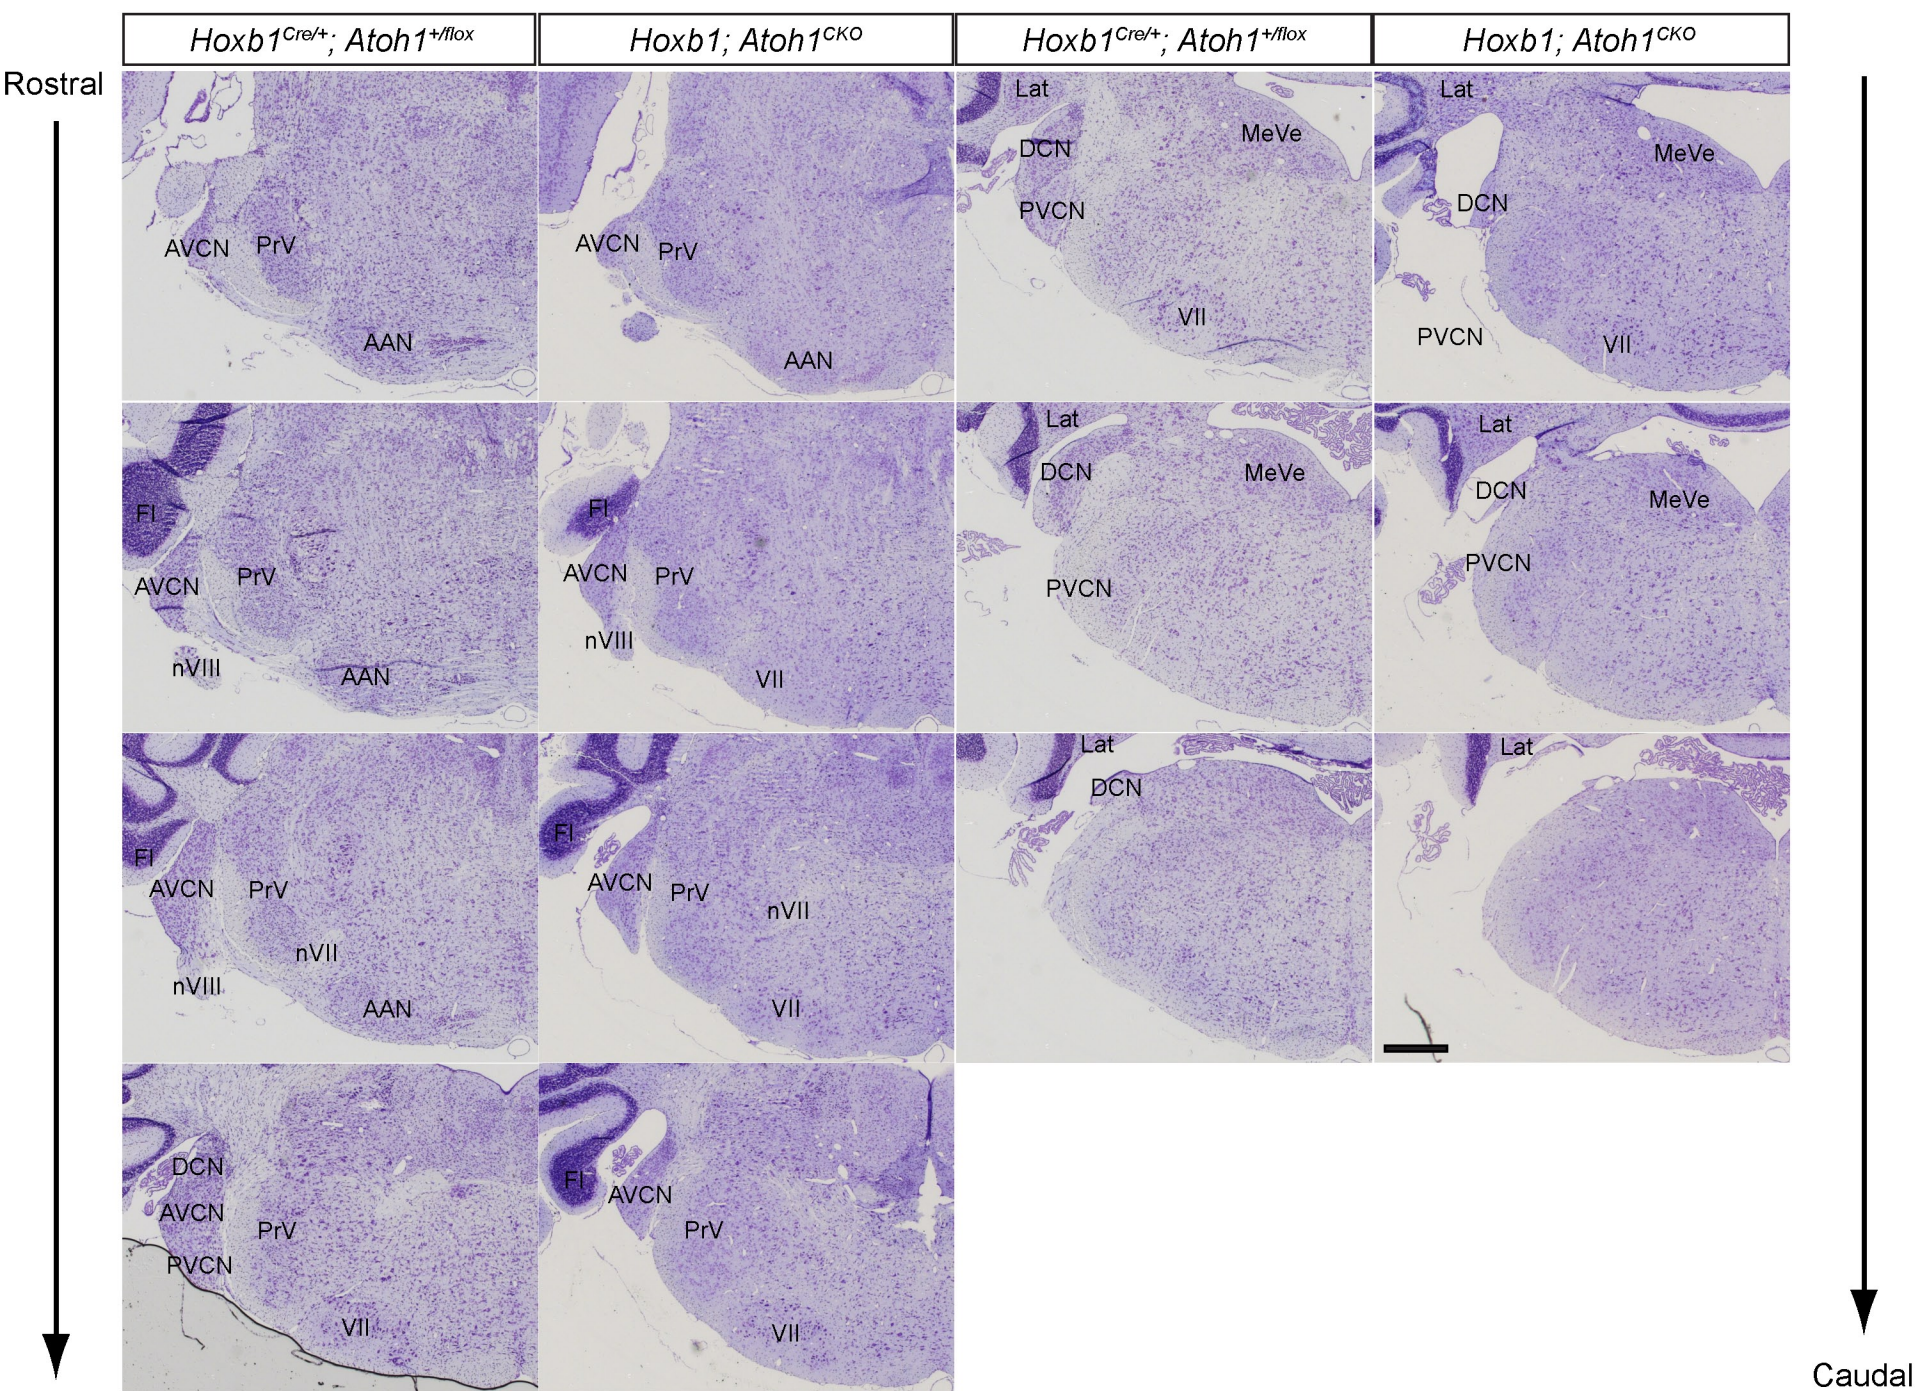

Supplemental Figure 3 - Maricich et al

Supplement: NIHMS140505-supplement-3.pdf [file NIHMS140505-supplement-3.pdf]
